# Supplementary material for: Reference values of respiratory impedance with impulse oscillometry in healthy Chinese adults
Source: PubMed Central journal article supplement — J Thorac Dis. 2021 Jun;13(6):3680–91. doi: 10.21037/jtd-20-3376 (PMC8264702; doi:10.21037/jtd-20-3376), 2021-06
Supplement: jtd-13-06-3680-supplementary.pdf [file jtd-13-06-3680-supplementary.pdf]

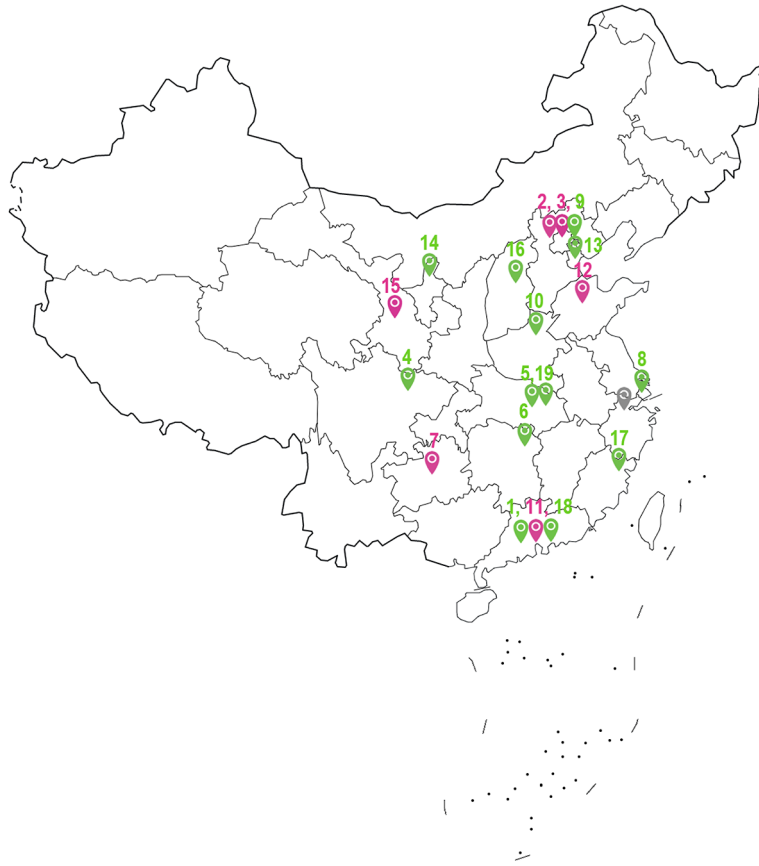

**Figure S1** Locations of the 20 centers in multicenter study of IO in China. The multicenter study of IO in China have 20 participated centers, which are tertiary hospitals that have started performing IO in the lung function laboratories for clinical use. Green marks indicate centers that provided IO data included in the final analysis of reference equations, pink marks indicate centers that collected IO data of healthy subjects but not being included in the final analysis. Grey mark indicates center that provided no IO data of healthy subjects but data of respiratory diseases in the study. IO, impulse oscillometry.

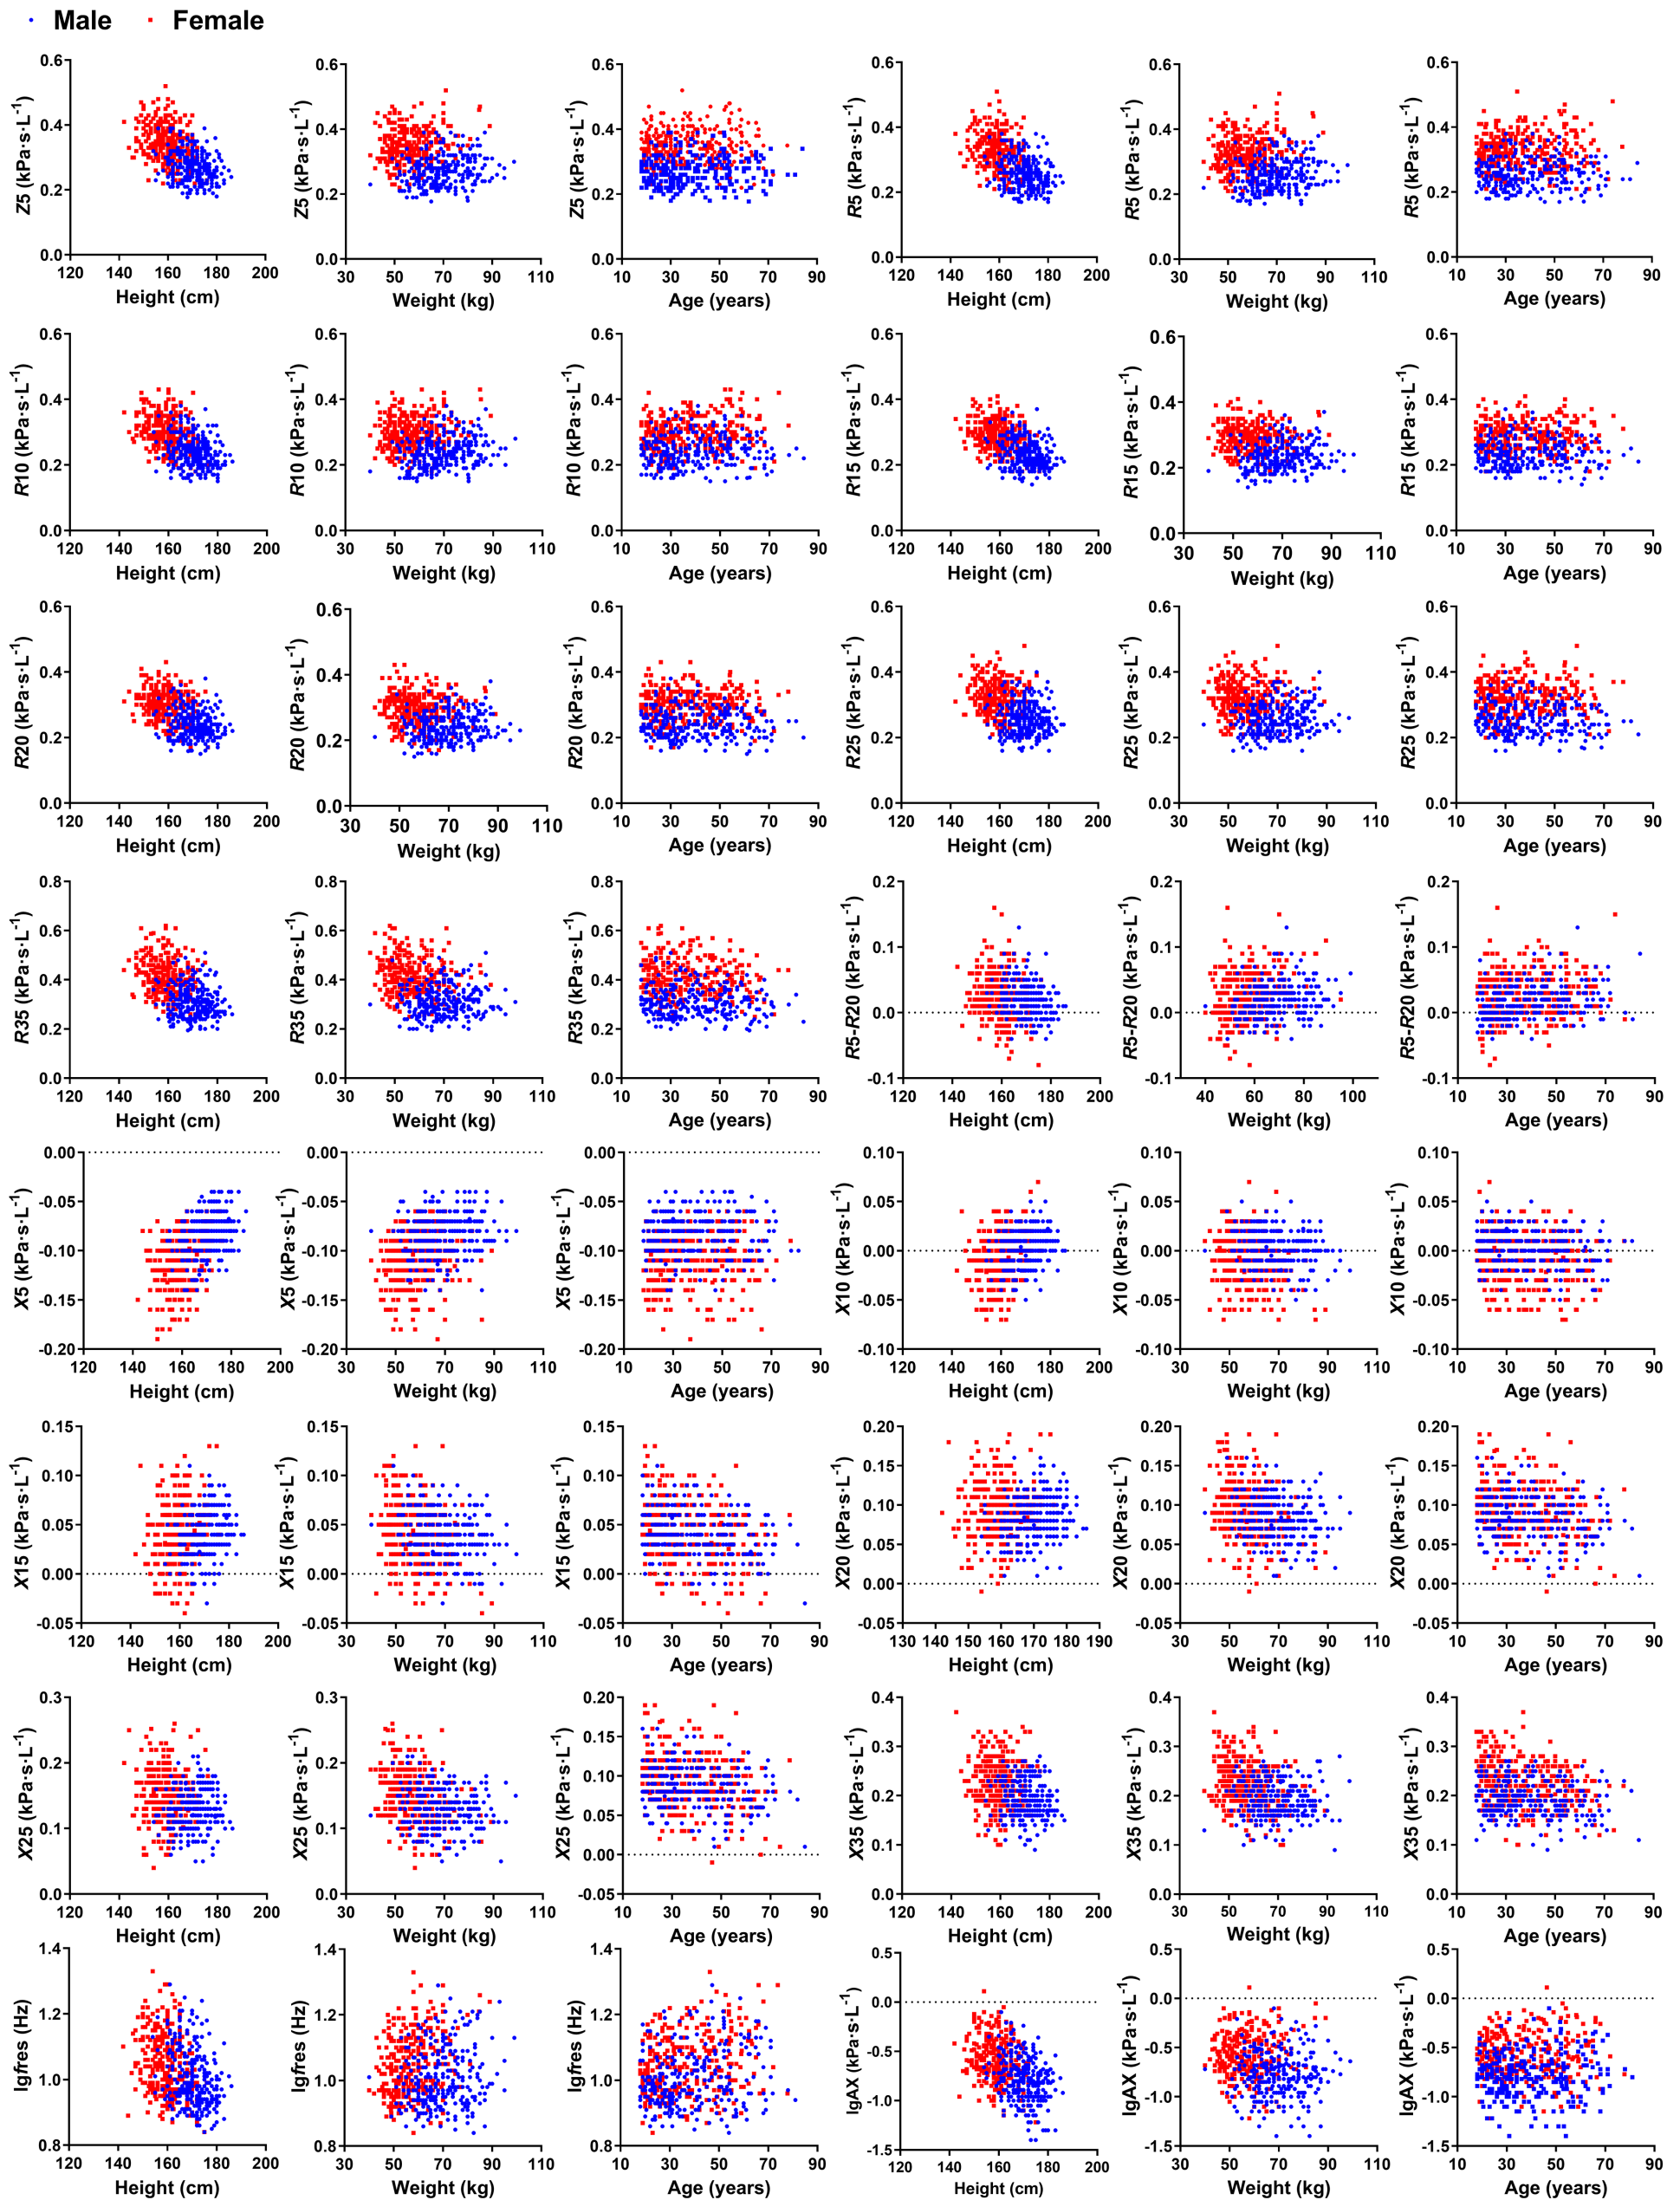

Figure S2 Scatter plots between IO indices and height, weight, age of the study population. IO, impulse oscillometry.

**Table S1** Numbers of collected data and analyzed data of each centers

| Centers                                                                                               | Number of collected data | Number of analyzed data |
|-------------------------------------------------------------------------------------------------------|--------------------------|-------------------------|
| The First Affiliated Hospital of Guangzhou Medical University                                         | 73                       | 45                      |
| Beijing Hospital                                                                                      | 187                      | 0                       |
| Beijing Children's Hospital, Capital Medical University                                               | 5                        | 0                       |
| West China Hospital of Sichuan University                                                             | 144                      | 129                     |
| Tongji Hospital Affiliated to Tongji Medical College of Huazhong University of Science and Technology | 71                       | 11                      |
| Xiangya Hospital, Central South University                                                            | 52                       | 26                      |
| Guizhou Provincial People's Hospital                                                                  | 28                       | 0                       |
| Shanghai Pulmonary Hospital                                                                           | 108                      | 78                      |
| Beijing Chao-Yang Hospital, Capital Medical University                                                | 55                       | 44                      |
| Henan Provincial People's Hospital                                                                    | 30                       | 1                       |
| Guangdong Provincial Hospital of Traditional Chinese Medicine                                         | 140                      | 0                       |
| Qilu Hospital of Shandong University                                                                  | 33                       | 0                       |
| Tianjin Medical University General Hospital                                                           | 30                       | 1                       |
| General Hospital of Ningxia Medical University                                                        | 3                        | 2                       |
| The First Hospital of Lanzhou University                                                              | 1                        | 0                       |
| Shanxi Bethune Hospital                                                                               | 124                      | 92                      |
| The First Affiliated Hospital of Fujian Medical University                                            | 185                      | 100                     |
| Zhujiang Hospital of Southern Medical University                                                      | 3                        | 2                       |
| Union Hospital of Tongji Medical College, Huazhong University of Science and Technology               | 51                       | 36                      |
| Total                                                                                                 | 1,318                    | 567                     |

**Table S2** Median (interquartile range) of IO indices in the study population and comparisons between genders

| IO indices                                     | Total (n=567) | Male (n=270) | Female (n=297) | P value |
|------------------------------------------------|---------------|--------------|----------------|---------|
| Z5 (kPa·L <sup>-1</sup> ·s <sup>-1</sup> )     | 0.31 (0.10)   | 0.27 (0.06)  | 0.35 (0.07)    | <0.001  |
| R5 (kPa·L <sup>-1</sup> ·s <sup>-1</sup> )     | 0.29 (0.09)   | 0.26 (0.07)  | 0.32 (0.07)    | <0.001  |
| R10 (kPa·L <sup>-1</sup> ·s <sup>-1</sup> )    | 0.27 (0.08)   | 0.23 (0.07)  | 0.29 (0.06)    | <0.001  |
| R15 (kPa·L <sup>-1</sup> ·s <sup>-1</sup> )    | 0.26 (0.08)   | 0.23 (0.06)  | 0.29 (0.06)    | <0.001  |
| R20 (kPa·L <sup>-1</sup> ·s <sup>-1</sup> )    | 0.27 (0.08)   | 0.24 (0.06)  | 0.30 (0.06)    | <0.001  |
| R25 (kPa·L <sup>-1</sup> ·s <sup>-1</sup> )    | 0.29 (0.10)   | 0.25 (0.07)  | 0.32 (0.07)    | <0.001  |
| R35 (kPa·L <sup>-1</sup> ·s <sup>-1</sup> )    | 0.31 (0.08)   | 0.31 (0.08)  | 0.40 (0.10)    | <0.001  |
| R5-R20 (kPa·L <sup>-1</sup> ·s <sup>-1</sup> ) | 0.01 (0.03)   | 0.01 (0.03)  | 0.03 (0.05)    | 0.001   |
| X5 (kPa·L <sup>-1</sup> ·s <sup>-1</sup> )     | -0.10 (0.04)  | -0.08 (0.03) | -0.11 (0.04)   | <0.001  |
| X10 (kPa·L <sup>-1</sup> ·s <sup>-1</sup> )    | 0.00 (0.03)   | 0.00 (0.03)  | -0.01 (0.04)   | <0.001  |
| X15 (kPa·L <sup>-1</sup> ·s <sup>-1</sup> )    | 0.04 (0.04)   | 0.04 (0.03)  | 0.04 (0.04)    | 0.856   |
| X20 (kPa·L <sup>-1</sup> ·s <sup>-1</sup> )    | 0.09 (0.04)   | 0.08 (0.03)  | 0.09 (0.05)    | 0.002   |
| X25 (kPa·L <sup>-1</sup> ·s <sup>-1</sup> )    | 0.14 (0.04)   | 0.13 (0.04)  | 0.15 (0.04)    | <0.001  |
| X35 (kPa·L <sup>-1</sup> ·s <sup>-1</sup> )    | 0.20 (0.06)   | 0.19 (0.05)  | 0.22 (0.07)    | <0.001  |
| AX (kPa·L <sup>-1</sup> ·s <sup>-1</sup> )     | 0.21 (0.16)   | 0.16 (0.10)  | 0.26 (0.19)    | <0.001  |
| fres (Hz)                                      | 10.21 (3.40)  | 9.55 (2.89)  | 10.87 (3.76)   | <0.001  |

Data are presented as median (interquartile range). P values were derived from the comparison of respiratory impedance between males and females. Z5, total respiratory impedance at 5 Hz; R5, R10, R15, R20, R25 and R35 respectively indicates resistance at 5, 10, 15, 20, 25 and 35 Hz. X5, X10, X15, X20, X25 and X35 respectively indicates reactance at 5, 10, 15, 20, 25 and 35 Hz. IO, impulse oscillometry; AX, low-frequency reactance area; fres, resonant frequency.

**Table S3** Reference equations of IO indices for males

| IO indices | Components | $\beta$ coefficients (95% CI) | SE of $\beta$ | P      | $R^2$  | RSD    |
|------------|------------|-------------------------------|---------------|--------|--------|--------|
| Z5         | Intercept  | 0.6811 (0.5387, 0.8236)       | 0.0723        | <0.001 | 0.1877 | 0.0415 |
|            | Height     | -0.0032 (-0.0041, -0.0023)    | 0.0005        | <0.001 |        |        |
|            | Weight     | 0.0019 (0.0013, 0.0024)       | 0.0003        | <0.001 |        |        |
| R5         | Intercept  | 0.6275 (0.4850, 0.7700)       | 0.0724        | <0.001 | 0.1789 | 0.0420 |
|            | Height     | -0.0030 (-0.0039, -0.0020)    | 0.0005        | <0.001 |        |        |
|            | Weight     | 0.0019 (0.0013, 0.0025)       | 0.0003        | <0.001 |        |        |
| R10        | Intercept  | 0.6361 (0.4965, 0.7757)       | 0.0709        | <0.001 | 0.2099 | 0.0408 |
|            | Height     | -0.0032 (-0.0041, -0.0023)    | 0.0005        | <0.001 |        |        |
|            | Weight     | 0.0021 (0.0015, 0.0026)       | 0.0003        | <0.001 |        |        |
| R15        | Intercept  | 0.5247 (0.3913, 0.6581)       | 0.0678        | <0.001 | 0.1224 | 0.0389 |
|            | Height     | -0.0023 (-0.0031, -0.0014)    | 0.0004        | <0.001 |        |        |
|            | Weight     | 0.0014 (0.0009, 0.0019)       | 0.0003        | <0.001 |        |        |
| R20        | Intercept  | 0.5038 (0.3445, 0.6630)       | 0.0809        | <0.001 | 0.0668 | 0.0401 |
|            | Height     | -0.0019 (-0.0028, -0.0009)    | 0.0005        | 0.005  |        |        |
|            | Weight     | 0.0010 (0.0004, 0.0015)       | 0.0003        | 0.002  |        |        |
|            | Age        | -0.0004 (-0.0008, -0.0001)    | 0.0002        | 0.032  |        |        |
| R25        | Intercept  | 0.2103 (0.1717, 0.2489)       | 0.0196        | <0.001 | 0.0209 | 0.0451 |
|            | Weight     | 0.0007 (0.0001, 0.0012)       | 0.0003        | 0.018  |        |        |
| R35        | -          | -                             | -             | -      | -      | -      |
| R5-R20     | Intercept  | 0.2485 (0.1780, 0.3181)       | 0.0358        | <0.001 | 0.2249 | 0.0205 |
|            | Height     | -0.0018 (-0.0022, -0.0013)    | 0.0002        | <0.001 |        |        |
|            | Weight     | 0.0010 (0.0007, 0.0013)       | 0.0001        | <0.001 |        |        |
| X5         | Intercept  | -0.3100 (-0.3863, -0.2337)    | 0.0388        | <0.001 | 0.1105 | 0.0195 |
|            | Height     | 0.0013 (0.0009, 0.0017)       | 0.0002        | <0.001 |        |        |
|            | Age        | 0.0002 (0.0001, 0.0004)       | 0.0001        | 0.009  |        |        |
| X10        | Intercept  | -0.1620 (-0.2166, -0.1074)    | 0.0277        | <0.001 | 0.1956 | 0.0157 |
|            | Height     | 0.0013 (0.0009, 0.0016)       | 0.0002        | <0.001 |        |        |
|            | Weight     | -0.0007 (-0.0019, -0.0005)    | 0.0001        | <0.001 |        |        |
| X15        | Intercept  | -0.1269 (-0.2418, -0.0718)    | 0.0406        | 0.002  | 0.2575 | 0.0199 |
|            | Height     | 0.0015 (0.0011, 0.0021)       | 0.0002        | <0.001 |        |        |
|            | Weight     | -0.0010 (-0.0013, -0.0007)    | 0.0001        | <0.001 |        |        |
|            | Age        | -0.0003 (-0.0004, -0.0001)    | 0.0001        | 0.0028 |        |        |
| X20        | Intercept  | -0.1506 (-0.2371, -0.0642)    | 0.044         | <0.001 | 0.1556 | 0.0247 |
|            | Height     | 0.0017 (0.0012, 0.0023)       | 0.000         | <0.001 |        |        |
|            | Weight     | -0.0009 (-0.0012, -0.0005)    | 0.000         | <0.001 |        |        |
|            | Age        | -0.0003 (-0.0004, -0.0001)    | 0.0001        | 0.003  |        |        |
| X25        | Intercept  | 0.1789 (0.1511, 0.2068)       | 0.0141        | <0.001 | 0.0666 | 0.0292 |
|            | Weight     | -0.0005 (-0.0008, -0.0001)    | 0.0002        | 0.012  |        |        |
|            | Age        | -0.0005 (-0.0007, -0.0002)    | 0.0001        | 0.001  |        |        |
| X35        | Intercept  | 0.3844 (0.2495, 0.5193)       | 0.0865        | <0.001 | 0.0454 | 0.0382 |
|            | Height     | -0.0010 (-0.0018, -0.0002)    | 0.0004        | 0.010  |        |        |
|            | Age        | -0.0005 (-0.0008, -0.0002)    | 0.0002        | 0.001  |        |        |
| lgfres     | Intercept  | 1.9238 (1.6487, 2.1988)       | 0.1397        | <0.001 | 0.1963 | 0.0801 |
|            | Height     | -0.0068 (-0.0085, -0.0050)    | 0.0009        | <0.001 |        |        |
|            | Weight     | 0.0033 (0.0022, 0.0044)       | 0.0006        | <0.001 |        |        |
| lgAX       | Intercept  | 1.3268 (0.5965, 2.0572)       | 0.3709        | 0.004  | 0.1179 | 0.2124 |
|            | Height     | -0.0142 (-0.0189, -0.0095)    | 0.0024        | <0.001 |        |        |
|            | Weight     | 0.0043 (0.0014, 0.0072)       | 0.0015        | 0.004  |        |        |

IO, impulse oscillometry; 95% CI, 95% confidential interval; SE, standard error;  $R^2$ , coefficient of determination; RSD, residual standard deviation. Z5, total respiratory impedance at 5 Hz; R5, R10, R15, R20, R25 and R35 respectively indicates resistance at 5, 10, 15, 20, 25 and 35 Hz; X5, X10, X15, X20, X25 and X35 respectively indicates reactance at 5, 10, 15, 20, 25 and 35 Hz; AX, low-frequency reactance area; fres, resonant frequency.

**Table S4** Reference equations of IO indices for females

| IO indices | Components | $\beta$ coefficients (95% CI) | SE of $\beta$ | P      | $R^2$  | RSD    |
|------------|------------|-------------------------------|---------------|--------|--------|--------|
| Z5         | Intercept  | 0.9110 (0.7378, 1.0841)       | 0.0880        | <0.001 | 0.1673 | 0.0493 |
|            | Height     | -0.0042 (-0.0053, -0.0030)    | 0.0006        | <0.001 |        |        |
|            | Weight     | 0.0023 (0.0015, 0.0031)       | 0.0004        | <0.001 |        |        |
|            | Age        | -0.0008 (-0.0013, -0.0003)    | 0.0002        | 0.001  |        |        |
| R5         | Intercept  | 0.8103 (0.6379, 0.9828)       | 0.0876        | <0.001 | 0.1606 | 0.0491 |
|            | Height     | -0.0038 (-0.0049, -0.0026)    | 0.0006        | <0.001 |        |        |
|            | Weight     | 0.0024 (0.0016, 0.0032)       | 0.0004        | <0.001 |        |        |
|            | Age        | -0.0005 (-0.0010, -0.0001)    | 0.0002        | 0.023  |        |        |
| R10        | Intercept  | 0.7013 (0.5641, 0.8386)       | 0.0697        | <0.001 | 0.1614 | 0.0440 |
|            | Height     | -0.0032 (-0.0041, -0.0023)    | 0.0005        | <0.001 |        |        |
|            | Weight     | 0.0019 (0.0012, 0.0025)       | 0.0003        | <0.001 |        |        |
| R15        | Intercept  | 0.5488 (0.4201, 0.6775)       | 0.0654        | <0.001 | 0.0593 | 0.0409 |
|            | Height     | -0.0019 (-0.0027, -0.0010)    | 0.0004        | <0.001 |        |        |
|            | Weight     | 0.0007 (0.0001, 0.0013)       | 0.0003        | 0.035  |        |        |
| R20        | Intercept  | 0.5042 (0.3668, 0.6415)       | 0.0698        | <0.001 | 0.0282 | 0.0442 |
|            | Height     | -0.0013 (-0.0021, -0.0004)    | 0.0004        | 0.004  |        |        |
| R25        | Intercept  | 0.4928 (0.3363, 0.6494)       | 0.0795        | <0.001 | 0.0154 | 0.0506 |
|            | Height     | -0.0011 (-0.0021, -0.0001)    | 0.0005        | 0.033  |        |        |
| R35        | Intercept  | 0.8407 (0.6050, 1.0764)       | 0.1197        | <0.001 | 0.0700 | 0.0499 |
|            | Height     | -0.0025 (-0.0039, -0.0011)    | 0.0007        | 0.001  |        |        |
|            | Age        | -0.0009 (-0.0015, -0.0003)    | 0.0003        | 0.005  |        |        |
| R5-R20     | Intercept  | 0.2360 (0.1405, 0.3315)       | 0.0485        | <0.001 | 0.1865 | 0.0306 |
|            | Height     | -0.0019 (-0.0026, -0.0013)    | 0.0002        | <0.001 |        |        |
|            | Weight     | 0.0017 (0.0013, 0.0022)       | 0.0003        | <0.001 |        |        |
| X5         | Intercept  | -0.3605 (-0.4406, -0.2805)    | 0.0407        | <0.001 | 0.1233 | 0.0236 |
|            | Height     | 0.0015 (0.0010, 0.0019)       | 0.0002        | <0.001 |        |        |
|            | Age        | 0.0004 (0.0002, 0.0006)       | 0.0001        | 0.006  |        |        |
| X10        | Intercept  | -0.2253 (-0.2956, -0.1551)    | 0.0357        | <0.001 | 0.2123 | 0.0225 |
|            | Height     | 0.0018 (0.0013, 0.0023)       | 0.0002        | <0.001 |        |        |
|            | Weight     | -0.0012 (-0.0015, -0.0009)    | 0.0002        | <0.001 |        |        |
| X15        | Intercept  | -0.1829 (-0.2706, -0.0951)    | 0.0446        | <0.001 | 0.2138 | 0.0281 |
|            | Height     | 0.0020 (0.0014, 0.0026)       | 0.0003        | <0.001 |        |        |
|            | Weight     | -0.0017 (-0.0021, -0.0013)    | 0.0002        | <0.001 |        |        |
| X20        | Intercept  | -0.0534 (-0.1579, 0.0511)     | 0.0531        | 0.316  | 0.1140 | 0.0335 |
|            | Height     | 0.0014 (0.0007, 0.0021)       | 0.0004        | <0.001 |        |        |
|            | Weight     | -0.0014 (-0.0019, -0.0010)    | 0.0002        | <0.001 |        |        |
| X25        | Intercept  | 0.2297 (0.2013, 0.2581)       | 0.0144        | <0.001 | 0.1123 | 0.0358 |
|            | Height     | -0.0010 (-0.0015, -0.0005)    | 0.0003        | <0.001 |        |        |
|            | Age        | -0.0005 (-0.0008, -0.0002)    | 0.0002        | 0.006  |        |        |
| X35        | Intercept  | 0.3214 (0.2863, 0.3565)       | 0.0186        | <0.001 | 0.1239 | 0.0440 |
|            | Weight     | -0.0012 (-0.0012, -0.0004)    | 0.0003        | 0.003  |        |        |
|            | Age        | -0.0008 (-0.0018, -0.0005)    | 0.0002        | <0.001 |        |        |
| lgfres     | Intercept  | 1.8261 (1.5738, 2.0785)       | 0.1282        | <0.001 | 0.2505 | 0.0805 |
|            | Height     | -0.0067 (-0.0084, -0.0050)    | 0.0009        | <0.001 |        |        |
|            | Weight     | 0.0051 (0.0039, 0.0063)       | 0.0006        | <0.001 |        |        |
| lgAX       | Intercept  | 1.6639 (0.9404, 2.3875)       | 0.3676        | <0.001 | 0.1540 | 0.2037 |
|            | Height     | -0.0166 (-0.0214, -0.01188)   | 0.0024        | <0.001 |        |        |
|            | Weight     | 0.0089 (0.0055, 0.0122)       | 0.0017        | <0.001 |        |        |
|            | Age        | -0.0029 (-0.0049, -0.0009)    | 0.0010        | 0.004  |        |        |

IO, impulse oscillometry; 95% CI, 95% confidential interval; SE, standard error;  $R^2$ , coefficient of determination; RSD, residual standard deviation. Z5, total respiratory impedance at 5 Hz; R5, R10, R15, R20, R25 and R35 respectively indicates resistance at 5, 10, 15, 20, 25 and 35 Hz; X5, X10, X15, X20, X25 and X35 respectively indicates reactance at 5, 10, 15, 20, 25 and 35 Hz; AX, low-frequency reactance area; fres, resonant frequency.

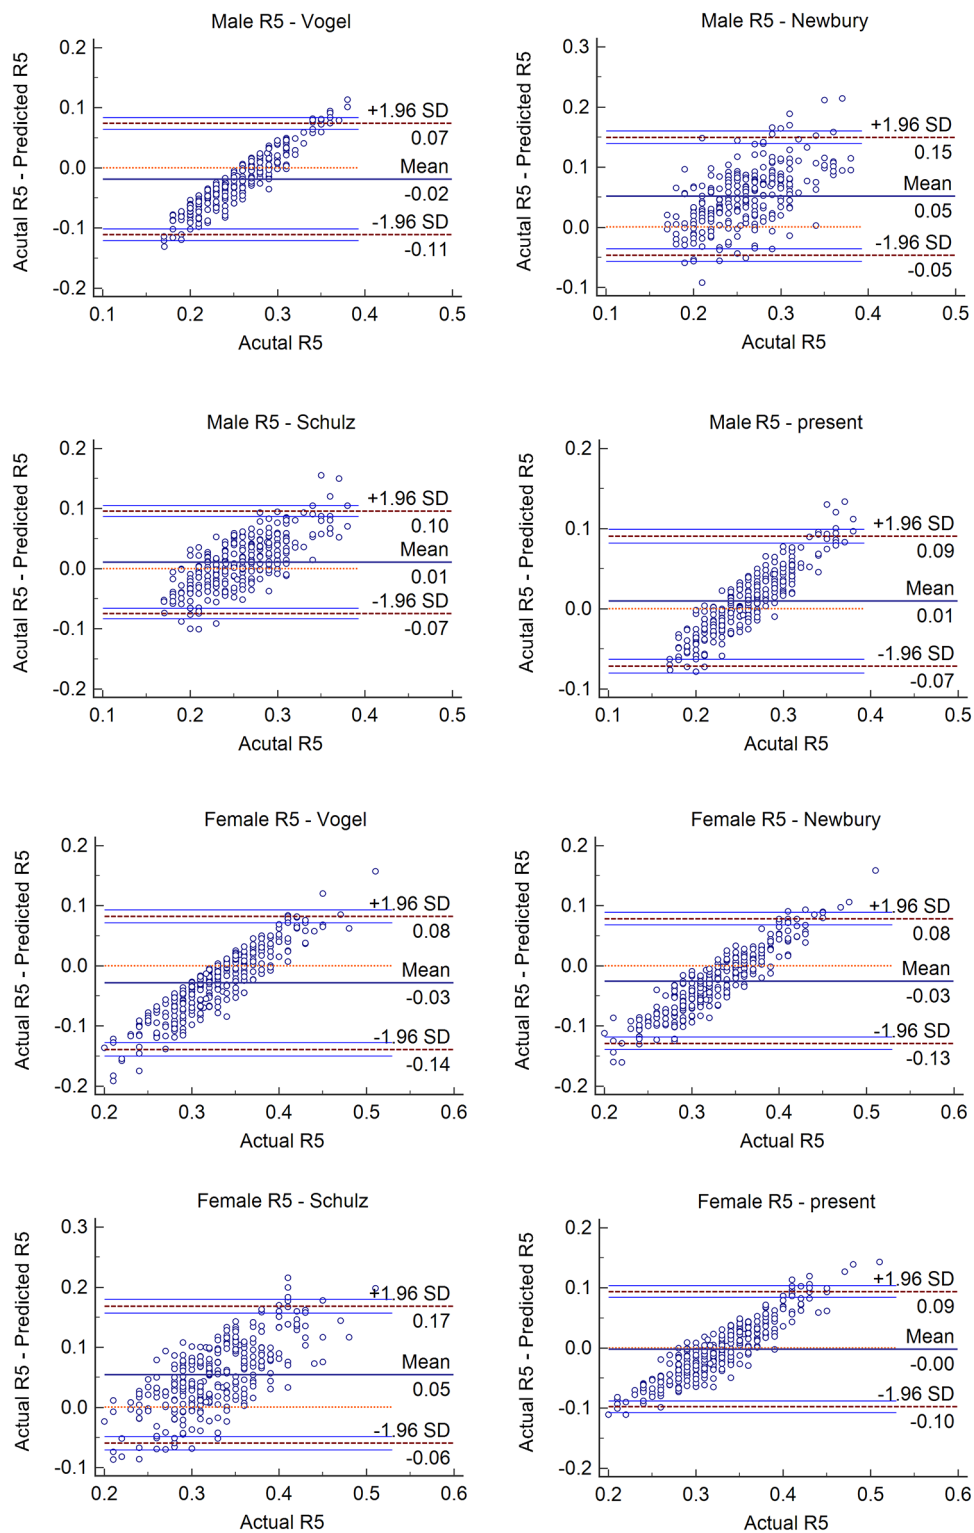

**Figure S3** Bland Altman plots for R5. X-axis were the actual values of R5 in healthy subjects of this study, Y-axis were the differences between the actual values and the predicted values. Predicted values were derived by equations of Vogel (9), Newbury (15) and Schulz (18) and the present study. Systematic differences were shown in reference values of Newbury in males, and reference values of Schulz in females.



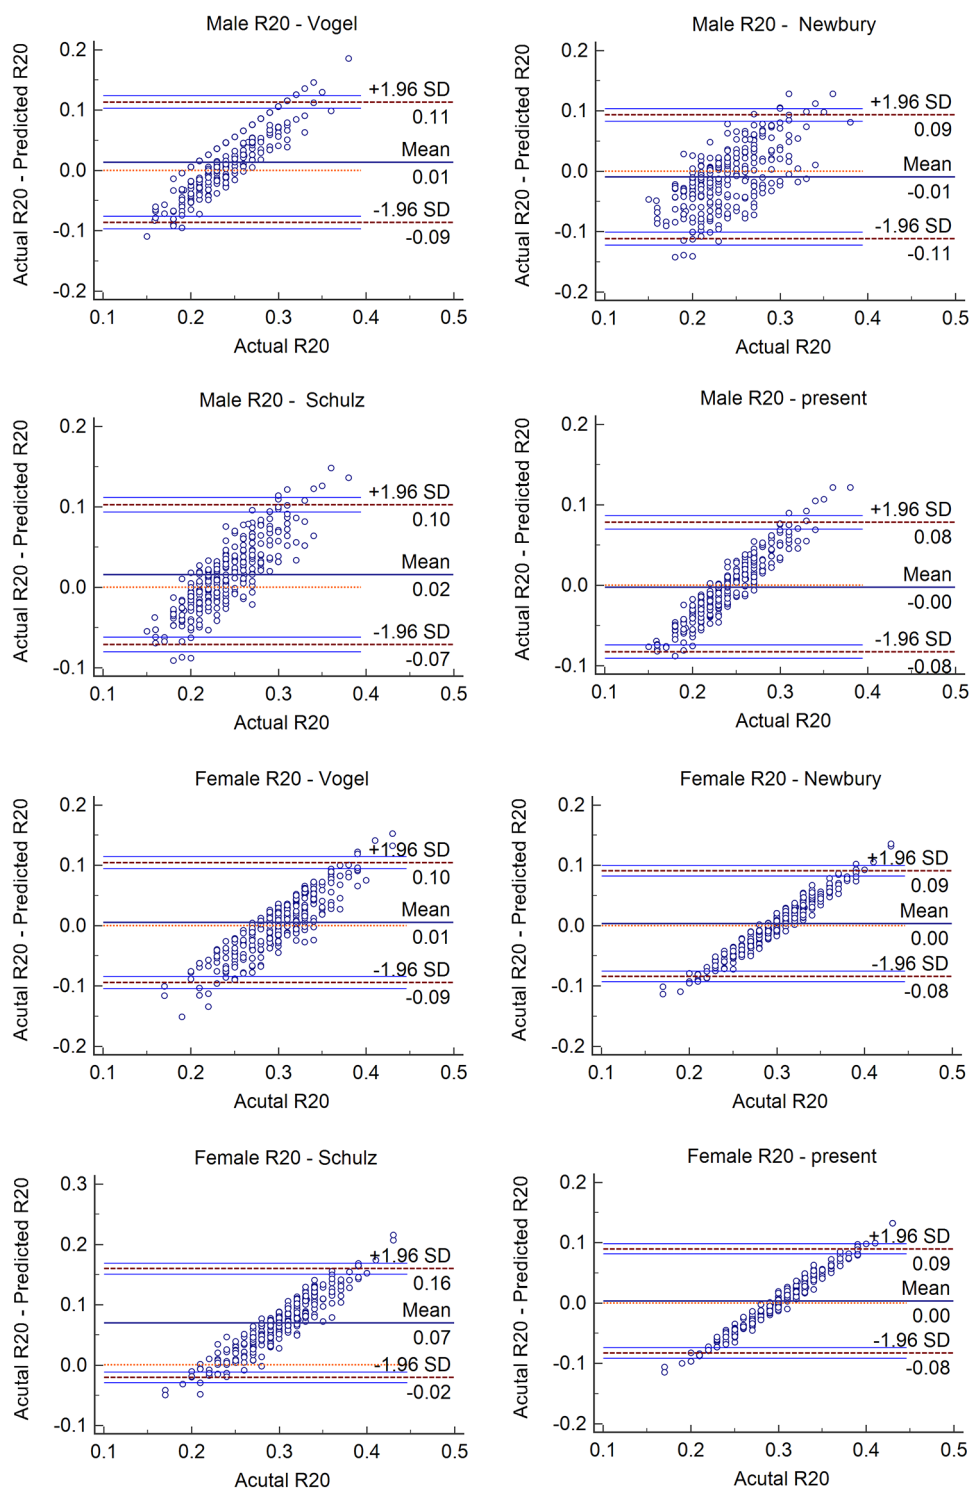

**Figure S4** Bland Altman plots for  $R_{20}$ . X-axis were the actual values of  $R_{20}$  in healthy subjects of this study, Y-axis were the differences between the actual values and the predicted values. Predicted values were derived by equations of Vogel (9), Newbury (15) and Schulz (18) and the present study. Systematic differences were shown in reference values of Schulz in females.

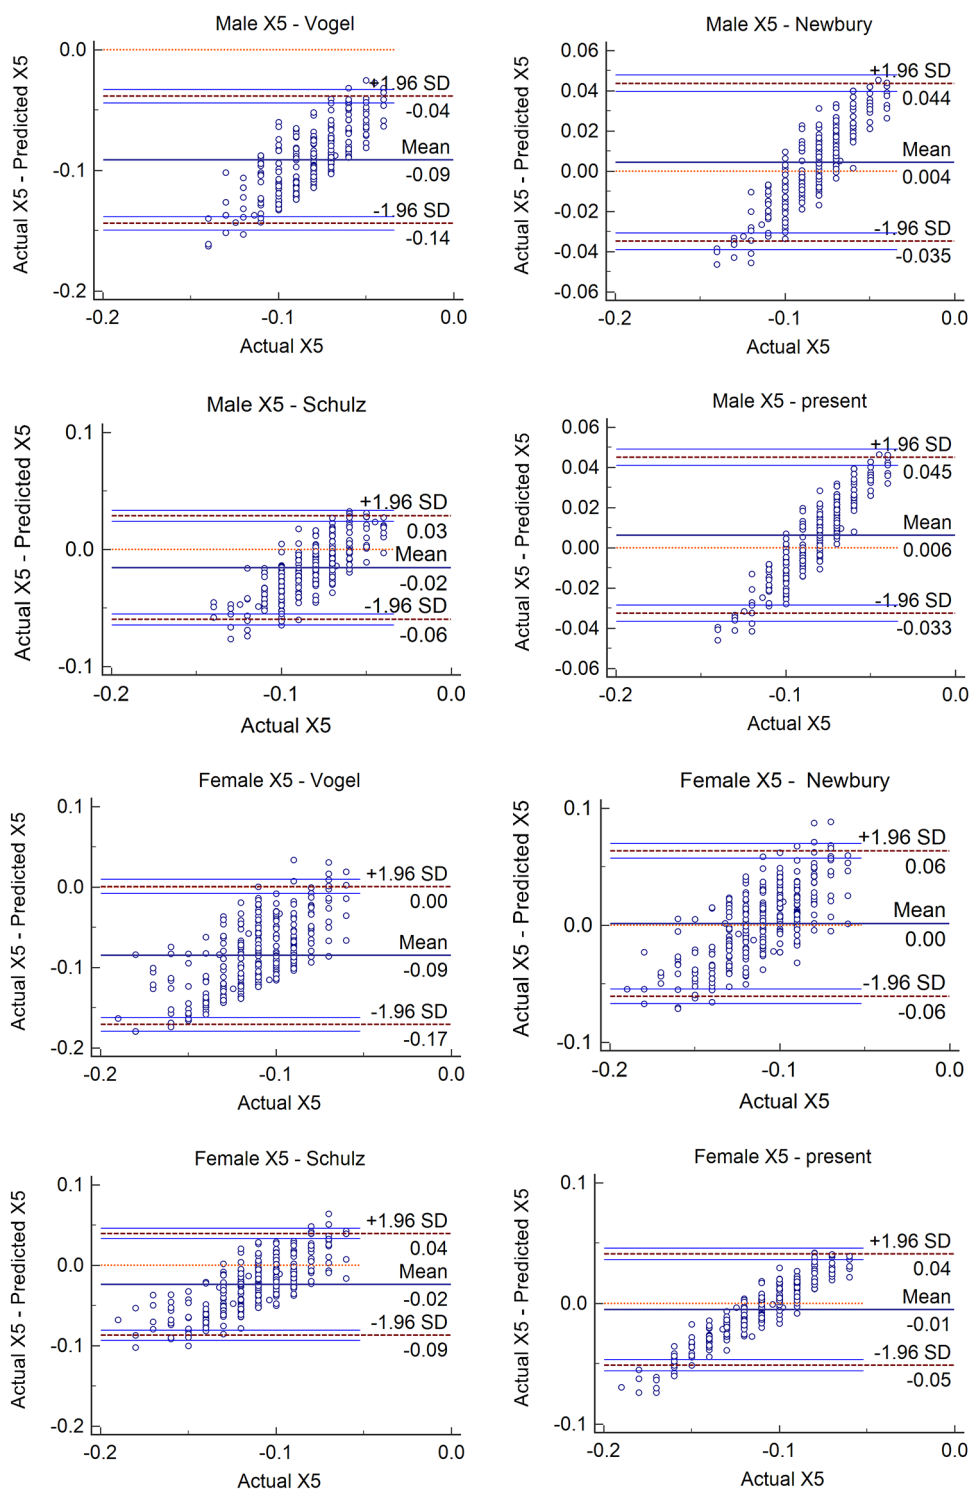

**Figure S5** Bland Altman plots for X5. X-axis were the actual values of X5 in healthy subjects of this study, Y-axis were the differences between the actual values and the predicted values. Predicted values were derived by equations of Vogel (9), Newbury (15) and Schulz (18) and the present study. Systematic differences were shown in reference values of Vogel in both males and females.
